# Supplementary material for: Genome-Scale Transcriptome Analysis of the Desert Shrub Artemisia sphaerocephala
Source: PLoS One. 2016 Apr 26;11(4):e0154300. doi: 10.1371/journal.pone.0154300 (PMC4846011; doi:10.1371/journal.pone.0154300)
Supplement: S10 Table — (XLSX) [file pone.0154300.s017.xlsx]

## Sheet: Sheet1
S10 table. Highly expressed cold-responsive unigenes.
	ID	Swissprot_annotation	nr_annotation
Kinases	c35935.graph_c0	predicted protein [Populus trichocarpa]	Phosphoribulokinase, chloroplastic (Precursor) GN=At1g32060 OS=Arabidopsis thaliana (Mouse-ear cress) PE=1 SV=1
	c70751.graph_c0	chloroplast phosphoglycerate kinase 3 [Helianthus annuus]	Phosphoglycerate kinase, chloroplastic (Precursor) OS=Nicotiana tabacum (Common tobacco) PE=1 SV=1
Chaperones	c57844.graph_c0	Heat shock protein 90 [Nicotiana tabacum]	Endoplasmin homolog (Precursor) GN=HSP90 OS=Catharanthus roseus (Madagascar periwinkle) PE=1 SV=1
	c61741.graph_c0	PREDICTED: 20 kDa chaperonin, chloroplastic [Vitis vinifera]	20 kDa chaperonin, chloroplastic (Precursor) GN=T1M15.120 OS=Arabidopsis thaliana (Mouse-ear cress) PE=1 SV=2
	c66615.graph_c1	PREDICTED: stromal 70 kDa heat shock-related protein, chloroplastic-like [Vitis vinifera]	Stromal 70 kDa heat shock-related protein, chloroplastic (Precursor) GN=HSP70 OS=Pisum sativum (Garden pea) PE=1 SV=1
LEAs	c54563.graph_c0	unknown [Solanum tuberosum]	Late embryogenesis abundant protein Lea5 GN=LEA5 OS=Citrus sinensis (Sweet orange) PE=2 SV=1
	c62062.graph_c0	unknown [Populus trichocarpa]	Dehydration-responsive protein RD22 (Precursor) GN=RD22 OS=Arabidopsis thaliana (Mouse-ear cress) PE=2 SV=1
	c68177.graph_c0	late embryogenis abundant protein 5 [Nicotiana tabacum]	Late embryogenesis abundant protein Lea5-A GN=LEA5-A OS=Gossypium hirsutum (Upland cotton) PE=2 SV=1
Enzymes	c28989.graph_c0	PREDICTED: ribulose-phosphate 3-epimerase, chloroplastic-like [Vitis vinifera]	Ribulose-phosphate 3-epimerase, chloroplastic (Precursor) GN=RPE OS=Spinacia oleracea (Spinach) PE=1 SV=1
	c34501.graph_c1	Ribulose bisphosphate carboxylase/oxygenase activase 1, chloroplast precursor, putative [Ricinus communis]	Ribulose bisphosphate carboxylase/oxygenase activase A, chloroplastic (Precursor) GN=RCAA OS=Hordeum vulgare (Barley) PE=2 SV=1
	c46778.graph_c0	predicted protein [Populus trichocarpa]	Cysteine proteinase inhibitor A OS=Helianthus annuus (Common sunflower) PE=1 SV=1
	c49700.graph_c0	GAPDH [Pericallis cruenta]	Glyceraldehyde 3-phosphate dehydrogenase GAPA2, chloroplastic (Precursor) GN=GAPA2 OS=Arabidopsis thaliana (Mouse-ear cress) PE=2 SV=1
	c54424.graph_c0	vacuolar ATP synthase subunit [Camellia sinensis]	V-type proton ATPase subunit E GN=VATE OS=Gossypium hirsutum (Upland cotton) PE=2 SV=1
	c56886.graph_c0	chloroplast ferredoxin-NADP+ oxidoreductase precursor [Capsicum annuum]	Ferredoxin--NADP reductase, leaf-type isozyme, chloroplastic (Precursor) GN=PETH OS=Nicotiana tabacum (Common tobacco) PE=2 SV=1
	c57260.graph_c0	catalase	Catalase OS=Helianthus annuus (Common sunflower) PE=2 SV=1
	c57260.graph_c1	RecName: Full=Catalase	Catalase OS=Helianthus annuus (Common sunflower) PE=2 SV=1
	c57288.graph_c0	quinone oxidoreductase-like protein [Helianthus annuus]	Quinone oxidoreductase-like protein At1g23740, chloroplastic (Precursor) GN=At1g23740 OS=Arabidopsis thaliana (Mouse-ear cress) PE=1 SV=2
	c59821.graph_c0	PREDICTED: uncharacterized protein LOC100250997 [Vitis vinifera]	ATP synthase subunit b&apos;, chloroplastic (Precursor) GN=ATPG OS=Spinacia oleracea (Spinach) PE=1 SV=2
	c60216.graph_c0	RecName: Full=Carbonic anhydrase 1; AltName: Full=Carbonate dehydratase 1	Carbonic anhydrase 1 OS=Flaveria linearis (Narrowleaf yellowtops) PE=2 SV=1
	c62512.graph_c0	RecName: Full=Serine hydroxymethyltransferase 1, mitochondrial; Short=SHMT1; AltName: Full=Glycine hydroxymethyltransferase 1; AltName: Full=Serine methylase 1; Flags: Precursor	Serine hydroxymethyltransferase 1, mitochondrial (Precursor) OS=Flaveria pringlei PE=2 SV=1
	c64305.graph_c0	cinnamoyl-CoA reductase [Codonopsis lanceolata]	Cinnamoyl-CoA reductase 1 GN=T24D18.5 OS=Arabidopsis thaliana (Mouse-ear cress) PE=1 SV=1
	c64421.graph_c0	Thiazole biosynthetic enzyme, chloroplast (ARA6) (THI1) (THI4) [Theobroma cacao]	Thiamine thiazole synthase, chloroplastic (Precursor) GN=THI1 OS=Citrus sinensis (Sweet orange) PE=2 SV=1
	c65515.graph_c0	PREDICTED: malate dehydrogenase, mitochondrial-like [Glycine max]	Malate dehydrogenase, mitochondrial (Precursor) GN=MMDH OS=Citrullus lanatus (Watermelon) PE=1 SV=1
	c65554.graph_c0	RecName: Full=Glutamine synthetase, chloroplastic; AltName: Full=GS2; AltName: Full=Glutamate--ammonia ligase; Flags: Precursor	Glutamine synthetase, chloroplastic (Precursor) GN=GLN2 OS=Daucus carota (Carrot) PE=2 SV=1
	c66942.graph_c0	arginine decarboxylase [Camellia sinensis]	Arginine decarboxylase OS=Pisum sativum (Garden pea) PE=2 SV=1
	c67031.graph_c0	PREDICTED: ATP synthase delta chain, chloroplastic-like [Solanum lycopersicum]	ATP synthase delta chain, chloroplastic (Precursor) GN=ATPD OS=Nicotiana tabacum (Common tobacco) PE=2 SV=1
	c67720.graph_c2	glyceraldehyde-3-phosphate dehydrogenase B [Pyrus x bretschneideri]	Glyceraldehyde-3-phosphate dehydrogenase GAPB, chloroplastic (Precursor) GN=GAPB OS=Arabidopsis thaliana (Mouse-ear cress) PE=1 SV=2
	c68110.graph_c0	plastid 3-keto-acyl-ACP synthase I [Helianthus annuus]	3-oxoacyl-[acyl-carrier-protein] synthase I, chloroplastic (Precursor) GN=KAS1 OS=Arabidopsis thaliana (Mouse-ear cress) PE=1 SV=2
	c69271.graph_c0	PREDICTED: sedoheptulose-1,7-bisphosphatase, chloroplastic-like [Fragaria vesca subsp. vesca]	Sedoheptulose-1,7-bisphosphatase, chloroplastic (Precursor) GN=At3g55800 OS=Arabidopsis thaliana (Mouse-ear cress) PE=1 SV=1
	c70546.graph_c0	RecName: Full=2,3-bisphosphoglycerate-independent phosphoglycerate mutase; Short=BPG-independent PGAM; Short=Phosphoglyceromutase; AltName: Full=PGAM-I	2,3-bisphosphoglycerate-independent phosphoglycerate mutase GN=PGM1 OS=Mesembryanthemum crystallinum (Common ice plant) PE=1 SV=1
Aquaporin	c59345.graph_c0	tonoplast intrinsic protein [Gossypium hirsutum]	Aquaporin TIP1-1 GN=T1J8.1 OS=Arabidopsis thaliana (Mouse-ear cress) PE=1 SV=1
Transcription and protein synthesis	c67077.graph_c0	PREDICTED: 60S acidic ribosomal protein P0-like [Solanum lycopersicum]	60S acidic ribosomal protein P0 OS=Glycine max (Soybean) PE=1 SV=1
Auxin-related	c55181.graph_c0	PREDICTED: auxin-binding protein ABP20-like [Cucumis sativus]	Germin-like protein subfamily 3 member 3 (Precursor) GN=At5g20630 OS=Arabidopsis thaliana (Mouse-ear cress) PE=1 SV=1
	c28897.graph_c0	PREDICTED: uncharacterized protein LOC100256940 [Vitis vinifera]	Glycine-rich RNA-binding protein 3, mitochondrial (Precursor) GN=MAF19_30 OS=Arabidopsis thaliana (Mouse-ear cress) PE=2 SV=1
	c46844.graph_c0	PREDICTED: glycine-rich RNA-binding protein-like isoform 1 [Solanum lycopersicum]	Glycine-rich RNA-binding protein 7 GN=F2G1.7 OS=Arabidopsis thaliana (Mouse-ear cress) PE=1 SV=1
	c49496.graph_c0	glycine-rich RNA-binding protein [Ricinus communis]	Glycine-rich RNA-binding protein OS=Daucus carota (Carrot) PE=2 SV=1
	c46837.graph_c0	PREDICTED: elongation factor 2-like [Fragaria vesca subsp. vesca]	Elongation factor 2 OS=Beta vulgaris (Sugar beet) PE=2 SV=1
	c47353.graph_c0	apolipoprotein d, putative [Ricinus communis]	--
	c49555.graph_c0	PREDICTED: plasma membrane-associated cation-binding protein 1-like isoform 2 [Fragaria vesca subsp. vesca]	Plasma membrane-associated cation-binding protein 1 GN=F1C12.180 OS=Arabidopsis thaliana (Mouse-ear cress) PE=1 SV=1
	c49620.graph_c0	Os07g0186000 [Oryza sativa Japonica Group]	Thioredoxin H-type GN=TRXH OS=Oryza sativa subsp. indica (Rice) PE=1 SV=1
	c54349.graph_c0	hydrophobic protein OSR8 [Solanum tuberosum]	UPF0057 membrane protein At2g24040 GN=At2g24040 OS=Arabidopsis thaliana (Mouse-ear cress) PE=2 SV=1
	c54988.graph_c0	conserved hypothetical protein [Ricinus communis]	Outer envelope pore protein 16, chloroplastic GN=OEP16 OS=Pisum sativum (Garden pea) PE=1 SV=1
	c55137.graph_c0	uncharacterized protein LOC100499951 [Glycine max]	--
	c57018.graph_c0	HyPRP2 [Gossypium hirsutum]	14 kDa proline-rich protein DC2.15 (Precursor) OS=Daucus carota (Carrot) PE=2 SV=1
	c60558.graph_c0	Bax inhibitor [Solanum lycopersicum]	Bax inhibitor 1 GN=BI-1 OS=Arabidopsis thaliana (Mouse-ear cress) PE=1 SV=1
	c61840.graph_c0	drought-induced protein SDi-6 - common sunflower (fragment)	--
	c62425.graph_c0	PREDICTED: proteasome subunit alpha type-3-like [Solanum lycopersicum]	Proteasome subunit alpha type-3 GN=T20P8.7 OS=Arabidopsis thaliana (Mouse-ear cress) PE=1 SV=2
	c64583.graph_c0	RecName: Full=Calnexin homolog; Flags: Precursor	Calnexin homolog (Precursor) OS=Helianthus tuberosus (Jerusalem artichoke) PE=2 SV=1
	c65047.graph_c0	PREDICTED: cytochrome b6-f complex iron-sulfur subunit, chloroplastic isoform 1 [Vitis vinifera]	Cytochrome b6-f complex iron-sulfur subunit, chloroplastic (Precursor) GN=petC OS=Spinacia oleracea (Spinach) PE=1 SV=2
	c66252.graph_c1	peroxiredoxins, prx-1, prx-2, prx-3, putative [Ricinus communis]	2-Cys peroxiredoxin BAS1, chloroplastic (Precursor) GN=BAS1 OS=Arabidopsis thaliana (Mouse-ear cress) PE=1 SV=2
	c67803.graph_c0	unnamed protein product [Helianthus annuus]	Early light-induced protein 1, chloroplastic (Precursor) GN=ELIP1 OS=Arabidopsis thaliana (Mouse-ear cress) PE=1 SV=1
	c68738.graph_c0	RecName: Full=29 kDa ribonucleoprotein A, chloroplastic; AltName: Full=CP29A; Flags: Precursor	29 kDa ribonucleoprotein A, chloroplastic (Precursor) OS=Nicotiana sylvestris (Wood tobacco) PE=2 SV=1
